# Supplementary material
Source: Elsevier journal article supplement (https://www.sciencedirect.com/science/article/pii/S0300289622000801)
Supplement: mmc1 [file S0300289622000801:mmc1.pdf]

## GUÍA DE PRÁCTICA CLÍNICA

### Actualización 2021 de la Guía Española de la EPOC (GesEPOC). Tratamiento no farmacológico

#### Suplemento

|                                                                                                                                       |
|---------------------------------------------------------------------------------------------------------------------------------------|
| <b>Pregunta para responder: Oxígeno suplementario durante el ejercicio frente a control en pacientes con EPOC sin hipoxemia grave</b> |
|---------------------------------------------------------------------------------------------------------------------------------------|

Se identificó una revisión sistemática (RS) relevante que incluía 44 ensayos clínicos aleatorizados (ECAs) (33 ensayos contribuyeron al análisis cuantitativo) que evalúa los efectos de la suplementación con oxígeno en pacientes con EPOC sin hipoxemia (o hipoxemia moderada) no tributarios de oxigenoterapia domiciliaria.

Los estudios evaluaron la suplementación de oxígeno (>21%) por vías no invasivas durante un periodo concreto de tiempo o por periodos más prolongados, durante el ejercicio durante las actividades de la vida diaria. Se evaluó principalmente el nivel de **disnea** (durante o tras el ejercicio, o al cabo de un seguimiento más prolongado) y la **calidad de vida**. La mayoría fueron estudios con un diseño cruzado realizados en el entorno del laboratorio con un seguimiento muy escaso (horas o pocos días).

Posteriormente, se identificaron 4 ECAs recientes y relevantes (Albert 2016, Jarosch 2017, Alison 2019, Hasler 2020).

Debido a la disparidad de medidas y escalas usadas los resultados se expresan en diferencias estandarizadas de la media (expresando un tamaño de efecto). Se han realizado análisis de subgrupos para aquellos estudios con un diseño paralelo o aquellos en los que el oxígeno no se administró exclusivamente durante el ejercicio, es decir, también durante las actividades de la vida diaria.

Un único estudio (Albert 2016) evaluó los pacientes tras un seguimiento de 1 a 6 años y proporcionó resultados para desenlaces clínicos como mortalidad,

exacerbaciones u hospitalización. Los pacientes recibieron oxigenoterapia continua si presentaban criterios de EPOC con hipoxemia moderada o durante el ejercicio y el sueño si presentaban desaturación durante el ejercicio. El grupo control no recibió oxígeno suplementario. Este estudio se describe de forma individual en el informe.

**Revisión sistemática:**

Ekström M, Ahmadi Z, Bornefalk-Hermansson A, Abernethy A, Currow D. Oxygen for breathlessness in patients with chronic obstructive pulmonary disease who do not qualify for home oxygen therapy. Cochrane Database of Systematic Reviews 2016, Issue 11. Art. No.: CD006429.

**Ensayos clínicos aleatorizados:**

Long-Term Oxygen Treatment Trial Research Group, Albert RK, Au DH, Blackford AL, Casaburi R, Cooper JA Jr, Criner GJ, Diaz P, Fuhlbrigge AL, Gay SE, Kanner RE, MacIntyre N, Martinez FJ, Panos RJ, Piantadosi S, Sciurba F, Shade D, Stibolt T, Stoller JK, Wise R, Yusef RD, Tonascia J, Sternberg AL, Bailey W. A Randomized Trial of Long-Term Oxygen for COPD with Moderate Desaturation. N Engl J Med. 2016 Oct 27;375(17):1617-1627.

Alison JA, McKeough ZJ, Leung RWM, Holland AE, Hill K, Morris NR, Jenkins S, Spencer LM, Hill CJ, Lee AL, Seale H, Cecins N, McDonald CF. Oxygen compared to air during exercise training in COPD with exercise-induced desaturation. Eur Respir J. 2019 May 30;53(5):1802429.

Hasler ED, Saxer S, Schneider SR, Furian M, Lichtblau M, Schwarz EI, Bloch KE, Ulrich S. Effect of Breathing Oxygen-Enriched Air on Exercise Performance in Patients with Chronic Obstructive Pulmonary Disease: Randomized, Placebo-Controlled, Cross-Over Trial. Respiration. 2020;99(3):213-224.

|                                                                                                                                                                                                                                                                                                                                                                                                                                                                                                                                                                                                                                                                                                    |                                |
|----------------------------------------------------------------------------------------------------------------------------------------------------------------------------------------------------------------------------------------------------------------------------------------------------------------------------------------------------------------------------------------------------------------------------------------------------------------------------------------------------------------------------------------------------------------------------------------------------------------------------------------------------------------------------------------------------|--------------------------------|
| Jarosch I, Gloeckl R, Damm E, Schwedhelm AL, Buhrow D, Jerrentrup A, Spruit MA, Kenn K. Short-term Effects of Supplemental Oxygen on 6-Min Walk Test Outcomes in Patients With COPD: A Randomized, Placebo-Controlled, Single-blind, Crossover Trial. Chest. 2017 Apr;151(4):795-803.                                                                                                                                                                                                                                                                                                                                                                                                              |                                |
| <b>Disnea</b>                                                                                                                                                                                                                                                                                                                                                                                                                                                                                                                                                                                                                                                                                      |                                |
| <p>La revisión sistemática identificó un total de 35 ECA que evaluaron la disnea como desenlace de resultado en un total de 865 pacientes. Posteriormente se identificaron tres ECA adicionales (Alison 2016, Jarosch 2017 y Hasler 2020) con un total de 141 pacientes que fueron incluidos en el análisis.</p> <p>El tratamiento con oxígeno suplementario muestra una reducción significativa en las puntuaciones de las diferentes escalas de disnea SMD 0.35 menos (0.47 a 0.24 menos). El estimador muestra el tamaño del efecto medido principalmente a través de la escala VAS y Borg.</p> <p>La confianza con los resultados es <b>muy baja</b> (ver tabla de resumen de resultados).</p> | <p><b>Calidad muy baja</b></p> |

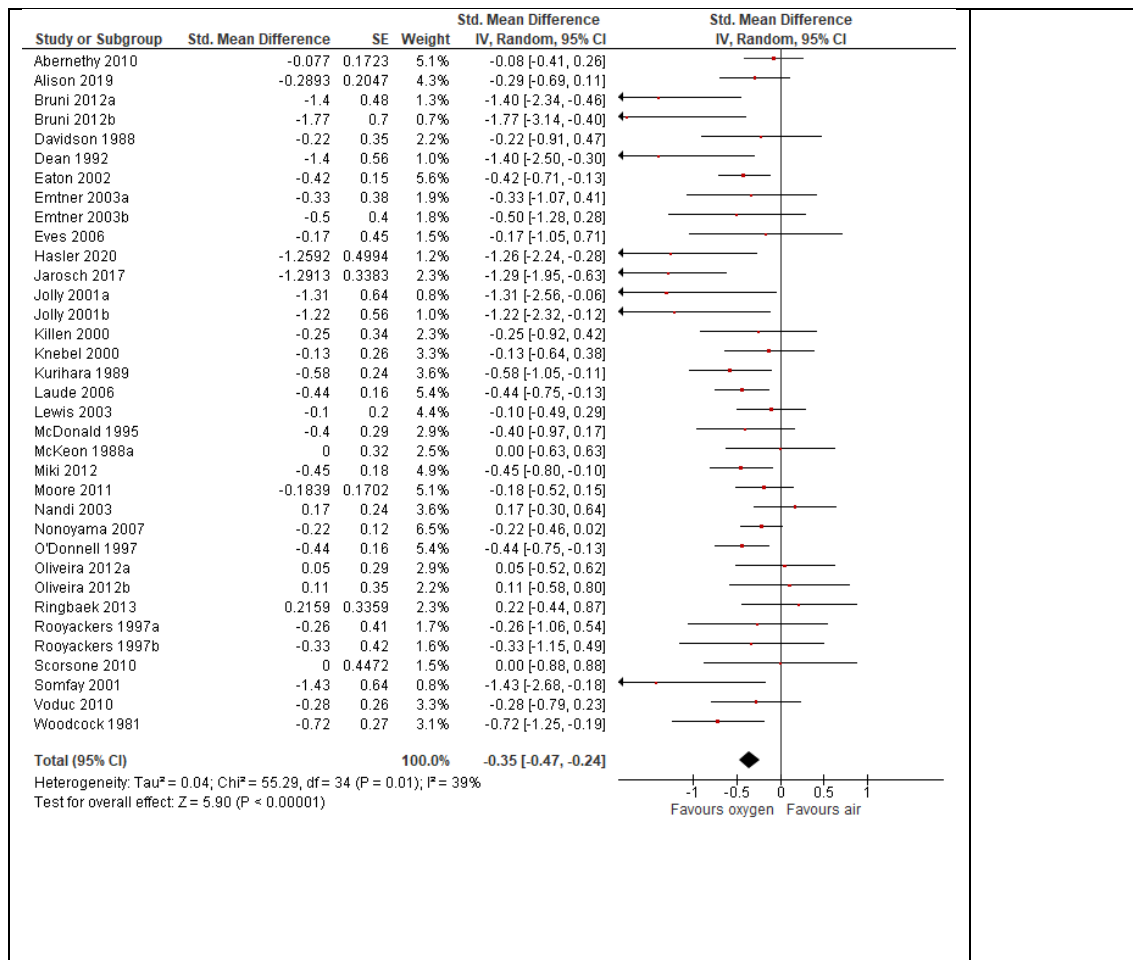

### Disnea: oxígeno NO administrado durante el ejercicio

La revisión sistemática identificó un total de 6 ECA que NO administraron el oxígeno suplementario durante el ejercicio, es decir que lo hicieron en el contexto de las actividades de la vida diaria. El tratamiento con oxígeno suplementario muestra una reducción significativa en las puntuaciones de las diferentes escalas de disnea aunque menos marcada SMD 0.23 menos (0.36 a 0.09 menos).

La confianza con los resultados es baja (ver tabla de resumen de resultados).

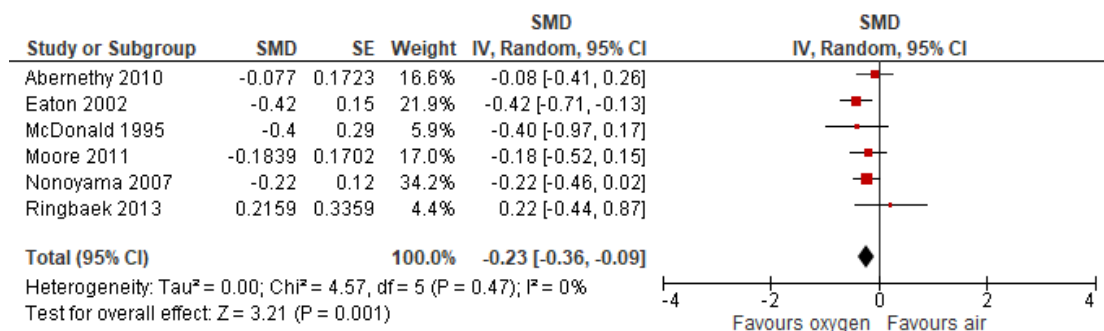

|                                                                                                                                                                                                                                                                                                                     |            |           |                                                                                    |                                   |                                   |
|---------------------------------------------------------------------------------------------------------------------------------------------------------------------------------------------------------------------------------------------------------------------------------------------------------------------|------------|-----------|------------------------------------------------------------------------------------|-----------------------------------|-----------------------------------|
| <b>Disnea: NO determinada durante el ejercicio</b>                                                                                                                                                                                                                                                                  |            |           |                                                                                    |                                   |                                   |
| La revisión sistemática identificó 2 ECA que NO evaluaron la disnea durante el ejercicio. El tratamiento con oxígeno suplementario no muestra diferencias significativas SMD 0.13 menos (0.37 menos a 0.11 más).                                                                                                    |            |           |                                                                                    |                                   |                                   |
| La confianza con los resultados es baja (ver tabla de resumen de resultados).                                                                                                                                                                                                                                       |            |           |                                                                                    |                                   |                                   |
|                                                                                                                                                                                                                                                                                                                     |            |           | 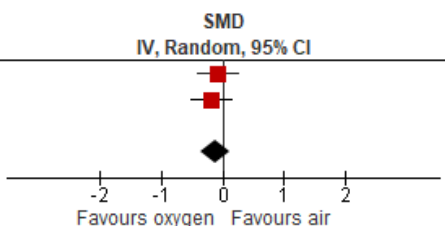 |                                   |                                   |
| <b>Study or Subgroup</b>                                                                                                                                                                                                                                                                                            | <b>SMD</b> | <b>SE</b> | <b>Weight</b>                                                                      | <b>SMD<br/>IV, Random, 95% CI</b> | <b>SMD<br/>IV, Random, 95% CI</b> |
| Abernethy 2010                                                                                                                                                                                                                                                                                                      | -0.077     | 0.1723    | 49.4%                                                                              | -0.08 [-0.41, 0.26]               |                                   |
| Moore 2011                                                                                                                                                                                                                                                                                                          | -0.1839    | 0.1702    | 50.6%                                                                              | -0.18 [-0.52, 0.15]               |                                   |
| <b>Total (95% CI)</b>                                                                                                                                                                                                                                                                                               |            |           | <b>100.0%</b>                                                                      | <b>-0.13 [-0.37, 0.11]</b>        |                                   |
| Heterogeneity: Tau <sup>2</sup> = 0.00; Chi <sup>2</sup> = 0.19, df = 1 (P = 0.66); I <sup>2</sup> = 0%                                                                                                                                                                                                             |            |           |                                                                                    |                                   |                                   |
| Test for overall effect: Z = 1.08 (P = 0.28)                                                                                                                                                                                                                                                                        |            |           |                                                                                    |                                   |                                   |
| <b>Disnea: estudios de diseño paralelo</b>                                                                                                                                                                                                                                                                          |            |           |                                                                                    |                                   |                                   |
| La revisión sistemática identificó un total de 11 ECA con un diseño de grupos paralelos aunque sólo 8 aportaron resultados para el meta-análisis. Posteriormente se identificaron tres ECA adicionales (Alison 2016, Jarosch 2017 y Hasler 2020) con un total de 141 pacientes que fueron incluidos en el análisis. |            |           |                                                                                    |                                   |                                   |
| El análisis de los estudios con un diseño paralelo muestra que el tratamiento con oxígeno suplementario se asocia a una reducción significativa en las puntuaciones de las diferentes escalas de disnea SMD 0.33 menos (0.56 a 0.09 menos).                                                                         |            |           |                                                                                    |                                   |                                   |
| La confianza con los resultados es muy baja (ver tabla de resumen de resultados).                                                                                                                                                                                                                                   |            |           |                                                                                    |                                   |                                   |

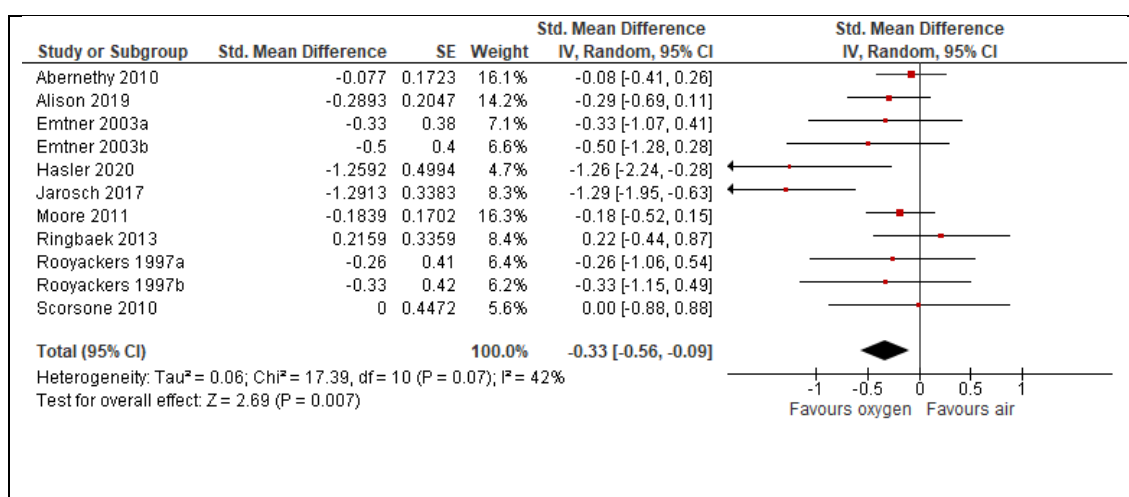

## Calidad de vida

La revisión sistemática identificó un total de 6 ECA evaluaron aspectos de calidad de vida. Posteriormente se identificaron dos ECA adicionales (Alison 2016, Albert 2016) aunque solo uno aportó datos al análisis.

Todos los estudios, excepto Spielmanns 2014, evaluaron la calidad de vida con la puntuación total de la escala CRQ (Chronic Respiratory disease Questionnaire).

El análisis no muestra diferencias significativas entre la administración de oxígeno suplementario y el control: SMD 0.12 (0.04 menos a 0.27 más) (6 ECAs). El análisis incluyó dos estudios que evaluaron los efectos de la intervención a más largo término (Moore 2011 a los 3 meses y Alison 2016 a los 6 meses) que tampoco mostraron diferencias significativas.

Adicionalmente un ECA que incluyó 738 pacientes (Albert 2016) no mostró diferencias significativas entre los pacientes que recibieron suplemento de oxígeno y el control en calidad de vida medida con la escala SGRQ (St George's Respiratory Questionnaire) en un seguimiento hasta los 4 años. El estudio no aporta resultados para incluir en el análisis.

**Calidad  
baja**

| <table><thead><tr><th>Study or Subgroup</th><th>Std. Mean Difference</th><th>SE</th><th>Weight</th><th>Std. Mean Difference<br/>IV, Random, 95% CI</th></tr></thead><tbody><tr><td>Alison 2019</td><td>0.1045</td><td>0.2273</td><td>11.5%</td><td>0.10 [-0.34, 0.55]</td></tr><tr><td>Eaton 2002</td><td>0.22</td><td>0.12</td><td>41.4%</td><td>0.22 [-0.02, 0.46]</td></tr><tr><td>Moore 2011</td><td>0.0647</td><td>0.1699</td><td>20.6%</td><td>0.06 [-0.27, 0.40]</td></tr><tr><td>Nonoyama 2007</td><td>-0.09</td><td>0.19</td><td>16.5%</td><td>-0.09 [-0.46, 0.28]</td></tr><tr><td>Rooyackers 1997</td><td>0.117</td><td>0.4087</td><td>3.6%</td><td>0.12 [-0.68, 0.92]</td></tr><tr><td>Spielmanns 2014</td><td>0.153</td><td>0.3062</td><td>6.4%</td><td>0.15 [-0.45, 0.75]</td></tr><tr><td><b>Total (95% CI)</b></td><td></td><td></td><td><b>100.0%</b></td><td><b>0.12 [-0.04, 0.27]</b></td></tr></tbody></table> <p>Heterogeneity: Tau<sup>2</sup> = 0.00; Chi<sup>2</sup> = 2.03, df = 5 (P = 0.84); I<sup>2</sup> = 0%<br/>Test for overall effect: Z = 1.50 (P = 0.13)</p> |                      |        |               |                                            | Study or Subgroup           | Std. Mean Difference | SE | Weight | Std. Mean Difference<br>IV, Random, 95% CI | Alison 2019 | 0.1045 | 0.2273 | 11.5% | 0.10 [-0.34, 0.55] | Eaton 2002 | 0.22 | 0.12 | 41.4% | 0.22 [-0.02, 0.46] | Moore 2011 | 0.0647 | 0.1699 | 20.6% | 0.06 [-0.27, 0.40] | Nonoyama 2007 | -0.09 | 0.19 | 16.5% | -0.09 [-0.46, 0.28] | Rooyackers 1997 | 0.117 | 0.4087 | 3.6% | 0.12 [-0.68, 0.92] | Spielmanns 2014 | 0.153 | 0.3062 | 6.4% | 0.15 [-0.45, 0.75] | <b>Total (95% CI)</b> |  |  | <b>100.0%</b> | <b>0.12 [-0.04, 0.27]</b> |  |
|-------------------------------------------------------------------------------------------------------------------------------------------------------------------------------------------------------------------------------------------------------------------------------------------------------------------------------------------------------------------------------------------------------------------------------------------------------------------------------------------------------------------------------------------------------------------------------------------------------------------------------------------------------------------------------------------------------------------------------------------------------------------------------------------------------------------------------------------------------------------------------------------------------------------------------------------------------------------------------------------------------------------------------------------------------------------------------------------------|----------------------|--------|---------------|--------------------------------------------|-----------------------------|----------------------|----|--------|--------------------------------------------|-------------|--------|--------|-------|--------------------|------------|------|------|-------|--------------------|------------|--------|--------|-------|--------------------|---------------|-------|------|-------|---------------------|-----------------|-------|--------|------|--------------------|-----------------|-------|--------|------|--------------------|-----------------------|--|--|---------------|---------------------------|--|
| Study or Subgroup                                                                                                                                                                                                                                                                                                                                                                                                                                                                                                                                                                                                                                                                                                                                                                                                                                                                                                                                                                                                                                                                               | Std. Mean Difference | SE     | Weight        | Std. Mean Difference<br>IV, Random, 95% CI |                             |                      |    |        |                                            |             |        |        |       |                    |            |      |      |       |                    |            |        |        |       |                    |               |       |      |       |                     |                 |       |        |      |                    |                 |       |        |      |                    |                       |  |  |               |                           |  |
| Alison 2019                                                                                                                                                                                                                                                                                                                                                                                                                                                                                                                                                                                                                                                                                                                                                                                                                                                                                                                                                                                                                                                                                     | 0.1045               | 0.2273 | 11.5%         | 0.10 [-0.34, 0.55]                         |                             |                      |    |        |                                            |             |        |        |       |                    |            |      |      |       |                    |            |        |        |       |                    |               |       |      |       |                     |                 |       |        |      |                    |                 |       |        |      |                    |                       |  |  |               |                           |  |
| Eaton 2002                                                                                                                                                                                                                                                                                                                                                                                                                                                                                                                                                                                                                                                                                                                                                                                                                                                                                                                                                                                                                                                                                      | 0.22                 | 0.12   | 41.4%         | 0.22 [-0.02, 0.46]                         |                             |                      |    |        |                                            |             |        |        |       |                    |            |      |      |       |                    |            |        |        |       |                    |               |       |      |       |                     |                 |       |        |      |                    |                 |       |        |      |                    |                       |  |  |               |                           |  |
| Moore 2011                                                                                                                                                                                                                                                                                                                                                                                                                                                                                                                                                                                                                                                                                                                                                                                                                                                                                                                                                                                                                                                                                      | 0.0647               | 0.1699 | 20.6%         | 0.06 [-0.27, 0.40]                         |                             |                      |    |        |                                            |             |        |        |       |                    |            |      |      |       |                    |            |        |        |       |                    |               |       |      |       |                     |                 |       |        |      |                    |                 |       |        |      |                    |                       |  |  |               |                           |  |
| Nonoyama 2007                                                                                                                                                                                                                                                                                                                                                                                                                                                                                                                                                                                                                                                                                                                                                                                                                                                                                                                                                                                                                                                                                   | -0.09                | 0.19   | 16.5%         | -0.09 [-0.46, 0.28]                        |                             |                      |    |        |                                            |             |        |        |       |                    |            |      |      |       |                    |            |        |        |       |                    |               |       |      |       |                     |                 |       |        |      |                    |                 |       |        |      |                    |                       |  |  |               |                           |  |
| Rooyackers 1997                                                                                                                                                                                                                                                                                                                                                                                                                                                                                                                                                                                                                                                                                                                                                                                                                                                                                                                                                                                                                                                                                 | 0.117                | 0.4087 | 3.6%          | 0.12 [-0.68, 0.92]                         |                             |                      |    |        |                                            |             |        |        |       |                    |            |      |      |       |                    |            |        |        |       |                    |               |       |      |       |                     |                 |       |        |      |                    |                 |       |        |      |                    |                       |  |  |               |                           |  |
| Spielmanns 2014                                                                                                                                                                                                                                                                                                                                                                                                                                                                                                                                                                                                                                                                                                                                                                                                                                                                                                                                                                                                                                                                                 | 0.153                | 0.3062 | 6.4%          | 0.15 [-0.45, 0.75]                         |                             |                      |    |        |                                            |             |        |        |       |                    |            |      |      |       |                    |            |        |        |       |                    |               |       |      |       |                     |                 |       |        |      |                    |                 |       |        |      |                    |                       |  |  |               |                           |  |
| <b>Total (95% CI)</b>                                                                                                                                                                                                                                                                                                                                                                                                                                                                                                                                                                                                                                                                                                                                                                                                                                                                                                                                                                                                                                                                           |                      |        | <b>100.0%</b> | <b>0.12 [-0.04, 0.27]</b>                  |                             |                      |    |        |                                            |             |        |        |       |                    |            |      |      |       |                    |            |        |        |       |                    |               |       |      |       |                     |                 |       |        |      |                    |                 |       |        |      |                    |                       |  |  |               |                           |  |
| La confianza con los resultados es baja (ver tabla de resumen de resultados).                                                                                                                                                                                                                                                                                                                                                                                                                                                                                                                                                                                                                                                                                                                                                                                                                                                                                                                                                                                                                   |                      |        |               |                                            |                             |                      |    |        |                                            |             |        |        |       |                    |            |      |      |       |                    |            |        |        |       |                    |               |       |      |       |                     |                 |       |        |      |                    |                 |       |        |      |                    |                       |  |  |               |                           |  |
| <b>Mortalidad</b>                                                                                                                                                                                                                                                                                                                                                                                                                                                                                                                                                                                                                                                                                                                                                                                                                                                                                                                                                                                                                                                                               |                      |        |               |                                            |                             |                      |    |        |                                            |             |        |        |       |                    |            |      |      |       |                    |            |        |        |       |                    |               |       |      |       |                     |                 |       |        |      |                    |                 |       |        |      |                    |                       |  |  |               |                           |  |
| Un ECA que incluyó 738 pacientes (Albert 2016) no mostró diferencias significativas entre los pacientes que recibieron suplemento de oxígeno y el control en mortalidad en un seguimiento hasta los 6 años. HR 0.90 (IC95% de 0.64 a 1.25), con un total de 139 eventos.<br><br>El subgrupo de 148 pacientes que recibió suplemento de oxígeno exclusivamente al ejercicio o sueño tampoco mostró diferencias frente al control para el desenlace muerte o primera hospitalización por cualquier causa. HR 1.05 (IC95% de 0.83 a 1.32)<br><br>La confianza con los resultados es moderada (ver tabla de resumen de resultados).                                                                                                                                                                                                                                                                                                                                                                                                                                                                 |                      |        |               |                                            | <b>Calidad<br/>Moderada</b> |                      |    |        |                                            |             |        |        |       |                    |            |      |      |       |                    |            |        |        |       |                    |               |       |      |       |                     |                 |       |        |      |                    |                 |       |        |      |                    |                       |  |  |               |                           |  |
| <b>Hospitalizaciones</b>                                                                                                                                                                                                                                                                                                                                                                                                                                                                                                                                                                                                                                                                                                                                                                                                                                                                                                                                                                                                                                                                        |                      |        |               |                                            |                             |                      |    |        |                                            |             |        |        |       |                    |            |      |      |       |                    |            |        |        |       |                    |               |       |      |       |                     |                 |       |        |      |                    |                 |       |        |      |                    |                       |  |  |               |                           |  |
| Un ECA que incluyó 738 pacientes (Albert 2016) no mostró diferencias significativas entre los pacientes que recibieron suplemento de oxígeno y el control en el tiempo hasta la primera hospitalización por cualquier causa en un seguimiento hasta los 6 años. HR 0.92 (IC95% de 0.77 a 1.10), 466 eventos.                                                                                                                                                                                                                                                                                                                                                                                                                                                                                                                                                                                                                                                                                                                                                                                    |                      |        |               |                                            | <b>Calidad<br/>Moderada</b> |                      |    |        |                                            |             |        |        |       |                    |            |      |      |       |                    |            |        |        |       |                    |               |       |      |       |                     |                 |       |        |      |                    |                 |       |        |      |                    |                       |  |  |               |                           |  |

|                                                                                                                                                                                                                                                                                                                                                                                                             |                                              |
|-------------------------------------------------------------------------------------------------------------------------------------------------------------------------------------------------------------------------------------------------------------------------------------------------------------------------------------------------------------------------------------------------------------|----------------------------------------------|
| <p>No se mostraron diferencias entre los dos grupos por lo que se refiere a la frecuencia de hospitalizaciones o de hospitalizaciones por EPOC [rate ratio: 1.01 (IC95% de 0.91 a 1.13), rate ratio: 0.99 (IC95% de 0.83 a 1.17), respectivamente].</p> <p>La confianza con los resultados es moderada (ver tabla de resumen de resultados).</p>                                                            |                                              |
| <b>Exacerbaciones</b>                                                                                                                                                                                                                                                                                                                                                                                       |                                              |
| <p>Un ECA que incluyó 738 pacientes (Albert 2016) no mostró diferencias significativas entre los pacientes que recibieron suplemento de oxígeno y el control en la frecuencia de exacerbaciones, rate ratio: 1.08 (0.98 a 1.19)</p> <p>La confianza con los resultados es moderada (ver tabla de resumen de resultados).</p>                                                                                | <p><b>Calidad</b></p> <p><b>Moderada</b></p> |
| <b>Balance entre beneficios y riesgos</b>                                                                                                                                                                                                                                                                                                                                                                   |                                              |
| <p>El análisis de la evidencia muestra que la oxigenoterapia durante el ejercicio o las actividades de la vida diaria muestra un efecto favorable en la reducción de la disnea</p> <p>Riesgos: No se observan efectos significativos en mortalidad o reducción de hospitalizaciones o exacerbaciones ni en calidad de vida. Hay que valorar el coste de la intervención sobre los beneficios obtenidos.</p> |                                              |
| <b>Calidad global de la evidencia</b>                                                                                                                                                                                                                                                                                                                                                                       |                                              |
| estudios de baja calidad metodológica y baja confianza en los resultados.                                                                                                                                                                                                                                                                                                                                   |                                              |
| <b>Valores y preferencias</b>                                                                                                                                                                                                                                                                                                                                                                               |                                              |
| No se realizó una búsqueda formal de la literatura.                                                                                                                                                                                                                                                                                                                                                         |                                              |
| <b>Uso de recursos y costes</b>                                                                                                                                                                                                                                                                                                                                                                             |                                              |
| No se realizó una búsqueda formal de la literatura.                                                                                                                                                                                                                                                                                                                                                         |                                              |



|                                                                                                                                                                                                                                                                                                                                                                                                                                                                                                                                       |
|---------------------------------------------------------------------------------------------------------------------------------------------------------------------------------------------------------------------------------------------------------------------------------------------------------------------------------------------------------------------------------------------------------------------------------------------------------------------------------------------------------------------------------------|
|                                                                                                                                                                                                                                                                                                                                                                                                                                                                                                                                       |
| <b>Recomendaciones</b>                                                                                                                                                                                                                                                                                                                                                                                                                                                                                                                |
| Se sugiere prescribir oxigenoterapia para deambulaci3n en pacientes con EPOC e hipoxemia moderada con desaturaci3n al ejercicio y disnea durante o tras el esfuerzo evaluando de forma individualizada sus beneficios con el paciente y su cuidador (recomendaci3n d3bil, evidencia baja).                                                                                                                                                                                                                                            |
| <b>Especificaciones</b>                                                                                                                                                                                                                                                                                                                                                                                                                                                                                                               |
| En pacientes con EPOC e hipoxemia moderada con desaturaci3n al ejercicio definidas como desaturaciones inferiores al 88% en el test de marcha, la oxigenoterapia durante la deambulaci3n muestra mejor3a en la disnea despu3s del ejercicio y en los dominios de disnea y fatiga de la calidad de vida. Sin embargo, no existen evidencias de que mejore la mortalidad ni la capacidad de ejercicio[46]. Se recomienda que tanto los pacientes como sus cuidadores reciban educaci3n sobre los equipos de ox3geno y su seguridad[39]. |

**Pregunta:** Oxígeno suplementario (durante el ejercicio) frente a control en pacientes con EPOC (sin hipoxemia severa)

| Certainty assessment                                                                                      |                    |                          |                          |                     |                    |                                                             | Nº de pacientes    |                    | Efecto                   |                                                     | Certainty        | Importancia |
|-----------------------------------------------------------------------------------------------------------|--------------------|--------------------------|--------------------------|---------------------|--------------------|-------------------------------------------------------------|--------------------|--------------------|--------------------------|-----------------------------------------------------|------------------|-------------|
| Nº de estudios                                                                                            | Diseño de estudio  | Riesgo de sesgo          | Inconsistencia           | Evidencia indirecta | Imprecisión        | Otras consideraciones                                       | Oxígeno            | Control            | Relativo (95% CI)        | Absoluto (95% CI)                                   |                  |             |
| Disnea - todos los estudios (evaluado con : diferentes escalas)                                           |                    |                          |                          |                     |                    |                                                             |                    |                    |                          |                                                     |                  |             |
| 35                                                                                                        | ensayos aleatorios | no es serio <sup>a</sup> | serio <sup>b</sup>       | no es serio         | serio <sup>c</sup> | se sospechaba fuertemente sesgo de publicación <sup>d</sup> | 0                  | 0                  | -                        | SMD 0.35 menor<br>(0.47 menor a 0.24 menor )        | ⊕○○○<br>MUY BAJA |             |
| Calidad de vida (evaluado con : diferentes escalas)                                                       |                    |                          |                          |                     |                    |                                                             |                    |                    |                          |                                                     |                  |             |
| 6                                                                                                         | ensayos aleatorios | no es serio <sup>a</sup> | no es serio              | no es serio         | serio <sup>c</sup> | se sospechaba fuertemente sesgo de publicación <sup>d</sup> | 0                  | 0                  | -                        | SMD 0.12 más alto.<br>(0.04 menor a 0.27 más alto.) | ⊕⊕○○<br>BAJA     |             |
| Disnea - subgrupo: oxígeno NO administrado durante el ejercicio (evaluado con : diferentes escalas)       |                    |                          |                          |                     |                    |                                                             |                    |                    |                          |                                                     |                  |             |
| 6                                                                                                         | ensayos aleatorios | no es serio <sup>a</sup> | no es serio              | no es serio         | serio <sup>c</sup> | se sospechaba fuertemente sesgo de publicación <sup>d</sup> | 0                  | 0                  | -                        | SMD 0.23 menor<br>(0.36 menor a 0.09 menor )        | ⊕⊕○○<br>BAJA     |             |
| Disnea - subgrupo: desenlace NO medido durante la prueba de ejercicio (evaluado con : diferentes escalas) |                    |                          |                          |                     |                    |                                                             |                    |                    |                          |                                                     |                  |             |
| 2                                                                                                         | ensayos aleatorios | no es serio <sup>a</sup> | no es serio              | no es serio         | serio <sup>c</sup> | se sospechaba fuertemente sesgo de publicación <sup>d</sup> | 0                  | 0                  | -                        | SMD 0.13 menor<br>(0.37 menor a 0.11 más alto.)     | ⊕⊕○○<br>BAJA     |             |
| Disnea - subgrupo: estudios con diseño paralelo (evaluado con : diferentes escalas)                       |                    |                          |                          |                     |                    |                                                             |                    |                    |                          |                                                     |                  |             |
| 11                                                                                                        | ensayos aleatorios | no es serio              | serio <sup>b</sup>       | no es serio         | serio <sup>c</sup> | se sospechaba fuertemente sesgo de publicación <sup>d</sup> | 0                  | 0                  | -                        | SMD 0.33 menor<br>(0.56 menor a 0.09 menor )        | ⊕○○○<br>MUY BAJA |             |
| Mortalidad (seguimiento: rango 1 años a 6 años )                                                          |                    |                          |                          |                     |                    |                                                             |                    |                    |                          |                                                     |                  |             |
| 1                                                                                                         | ensayos aleatorios | no es serio              | no es serio <sup>e</sup> | no es serio         | serio <sup>f</sup> | ninguno                                                     | 66/368<br>(17.9%)  | 73/370<br>(19.7%)  | HR 0.90<br>(0.64 a 1.25) | 18 menos por 1000<br>(de 66 menos a 43 más )        | ⊕⊕⊕○<br>MODERADO |             |
| Hospitalización por cualquier causa (evaluado con : tiempo hasta la primera hospitalización)              |                    |                          |                          |                     |                    |                                                             |                    |                    |                          |                                                     |                  |             |
| 1                                                                                                         | ensayos aleatorios | no es serio              | no es serio <sup>e</sup> | no es serio         | serio <sup>f</sup> | ninguno                                                     | 229/368<br>(62.2%) | 237/370<br>(64.1%) | HR 0.92<br>(0.77 a 1.10) | 31 menos por 1000<br>(de 95 menos a 35 más )        | ⊕⊕⊕○<br>MODERADO |             |

| Certainty assessment                       |                    |                 |                          |                     |                    |                       | Nº de pacientes |         | Efecto                                                              |                   | Certainty        | Importancia |
|--------------------------------------------|--------------------|-----------------|--------------------------|---------------------|--------------------|-----------------------|-----------------|---------|---------------------------------------------------------------------|-------------------|------------------|-------------|
| Nº de estudios                             | Diseño de estudio  | Riesgo de sesgo | Inconsistencia           | Evidencia indirecta | Imprecisión        | Otras consideraciones | Oxígeno         | Control | Relativo (95% CI)                                                   | Absoluto (95% CI) |                  |             |
| 1                                          | ensayos aleatorios | no es serio     | no es serio <sup>e</sup> | no es serio         | serio <sup>f</sup> | ninguno               |                 |         | Razón de densidad de incidencia (razón de tasas) 1.01 (0.91 a 1.13) |                   | ⊕⊕⊕○<br>MODERADO |             |
| Exacerbaciones (evaluado con : Frecuencia) |                    |                 |                          |                     |                    |                       |                 |         |                                                                     |                   |                  |             |
| 1                                          | ensayos aleatorios | no es serio     | no es serio <sup>e</sup> | no es serio         | serio <sup>f</sup> | ninguno               |                 |         | Razón de densidad de incidencia (razón de tasas) 1.08 (0.98 a 1.19) |                   | ⊕⊕⊕○<br>MODERADO |             |

CI: Intervalo de confianza ; SMD: Diferencia media estandarizada; HR: Razón de riesgos instantáneos

#### Explicaciones

- La mayoría de los estudios tuvo un diseño cruzado, de pequeño tamaño y con una descripción poco detallada del diseño y la metodología. Sin embargo no se ha considerado el riesgo de sesgo como una limitación mayor.
- Variabilidad significativa entre los resultados de los distintos estudios
- El IC95% no excluye un efecto poco relevante. El efecto medido con la desviación estandarizada de la media no permite un juicio clínico más preciso sobre la magnitud del efecto.
- Asimetría aparente en el diagrama de embudo en el que se aprecia que los estudios con un mayor tamaño de efecto (positivo) mostraron resultados muy imprecisos, sin correspondencia con estudios similares con resultados negativos. El análisis fue posible para el desenlace de disnea (35 estudios) aunque la sospecha es extensible a toda la revisión .
- Estudio único - no valorable
- El IC95% no excluye un efecto relevante beneficioso o perjudicial
